# Supplementary material for: BNIP3L/NIX regulates both mitophagy and pexophagy
Source: PubMed Central journal article supplement (PMC9753467; doi:10.15252/embj.2022111115), 2022-10-10

# Figure 2A

HIF1a  
WT KO  
DFP: - + - +

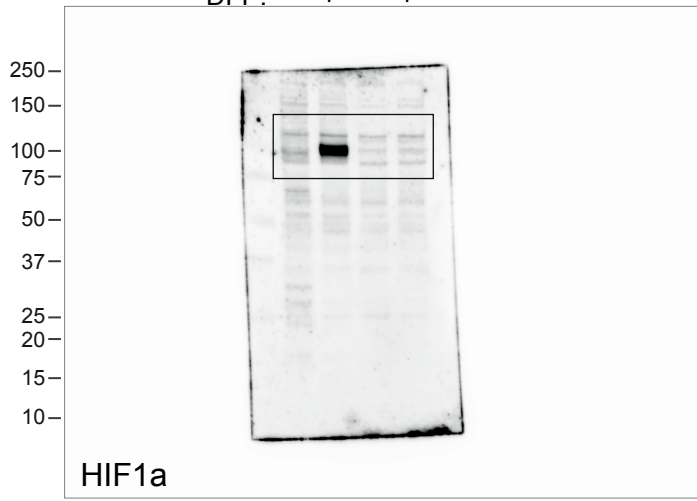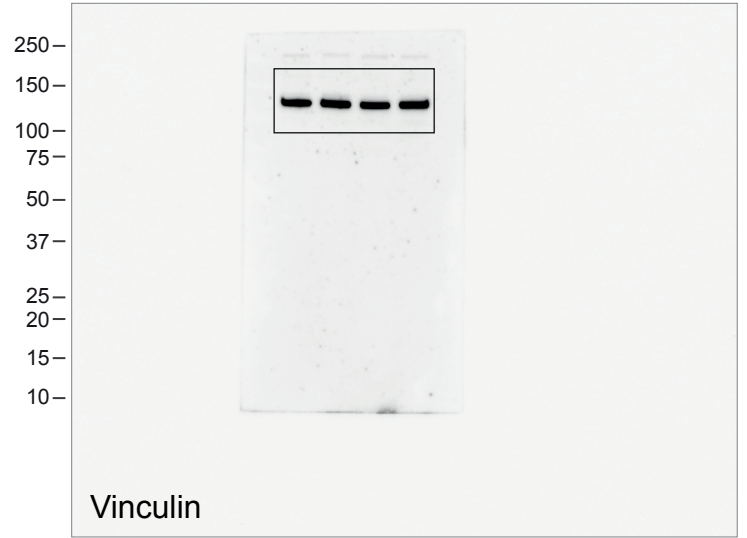

# Figure 2C

NIX KO  
WT CI 36 CI 31  
DFP(h): 0 24 48 0 24 48 0 24 48

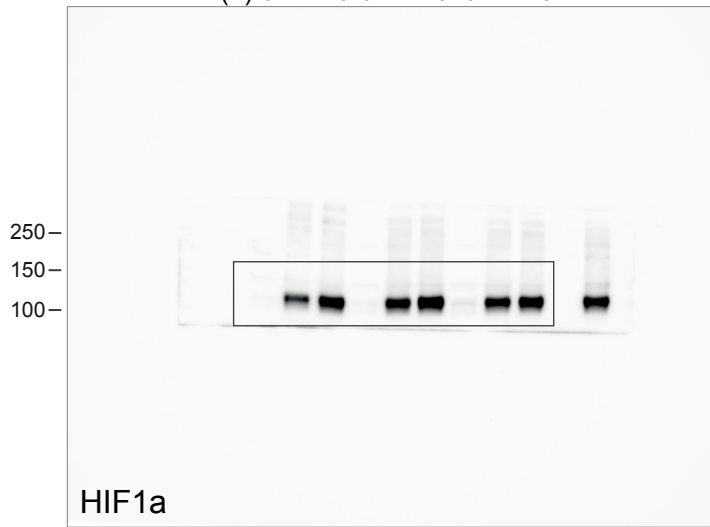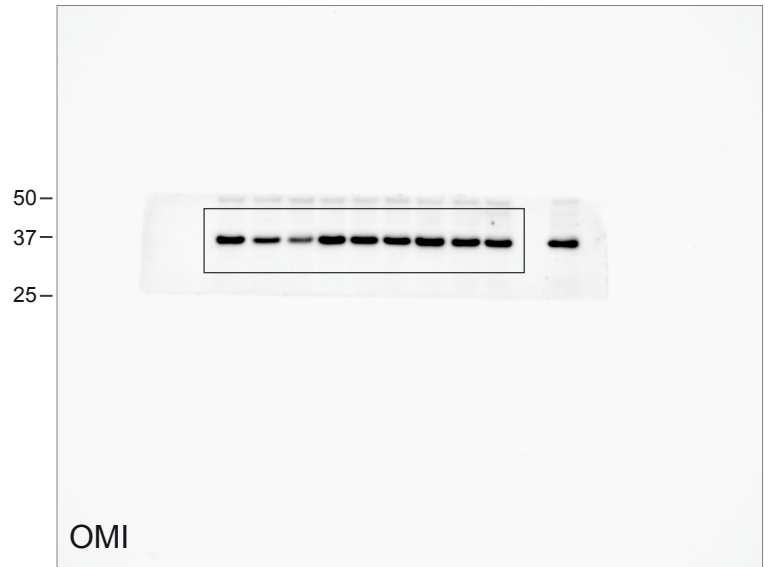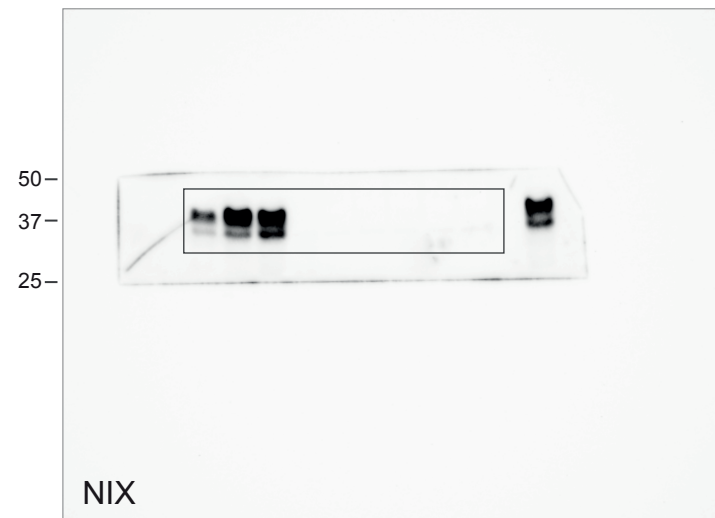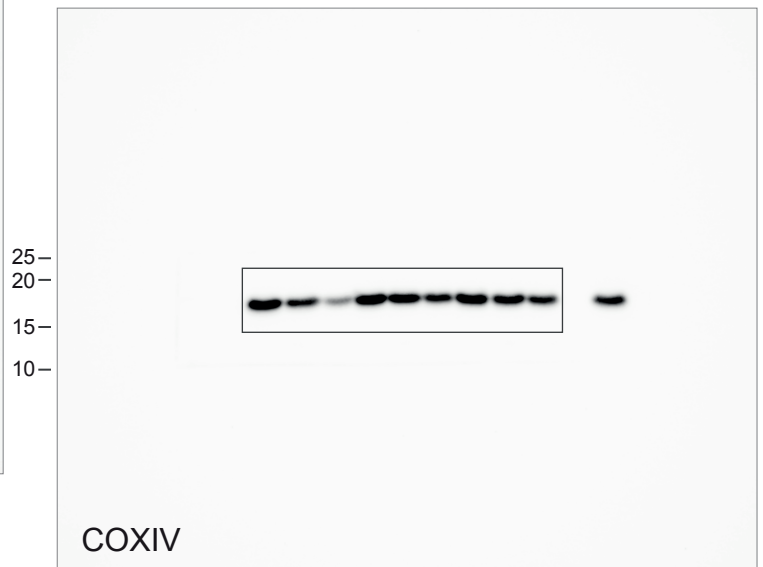

**Figure 2C**

NIX KO  
WT CI 36 CI 31  
DFP(h): 0 24 48 0 24 48 0 24 48

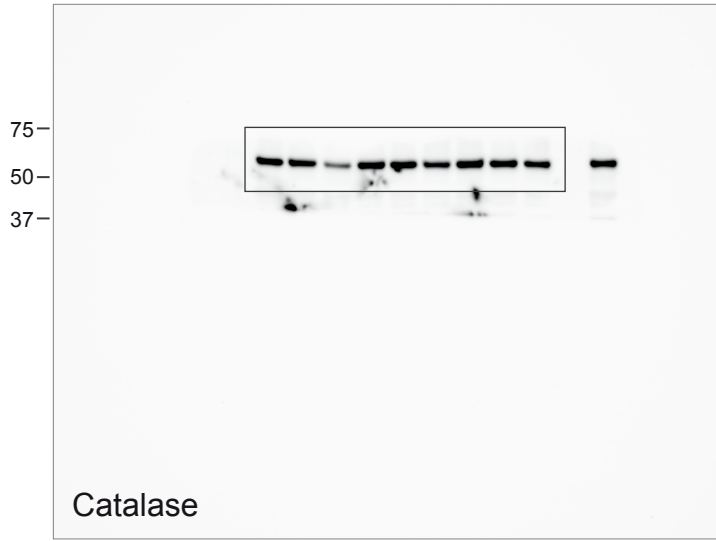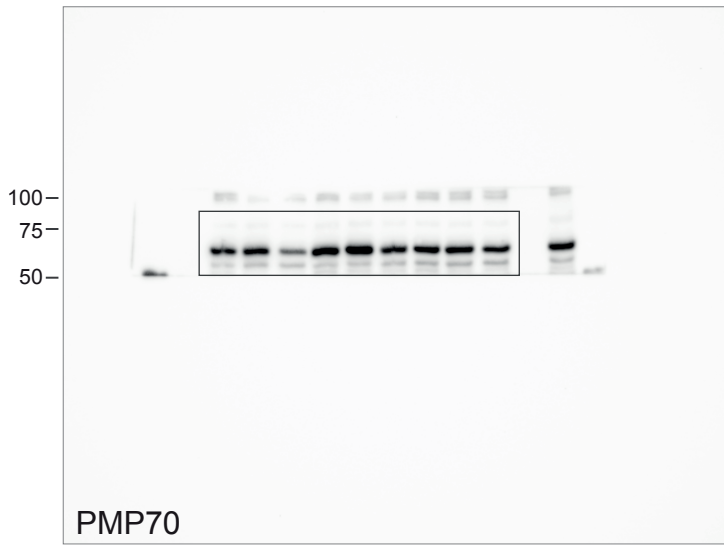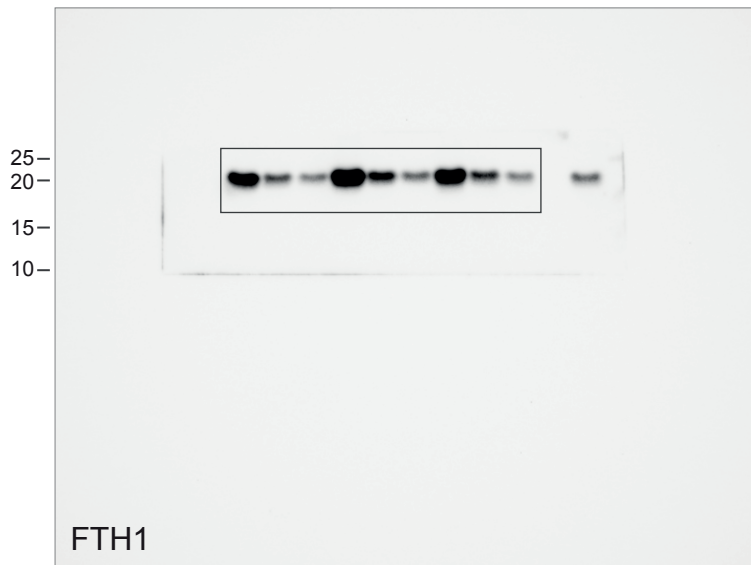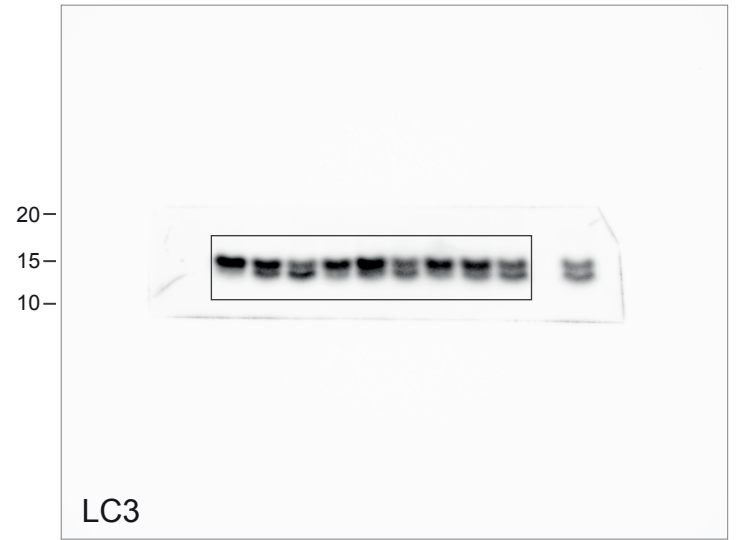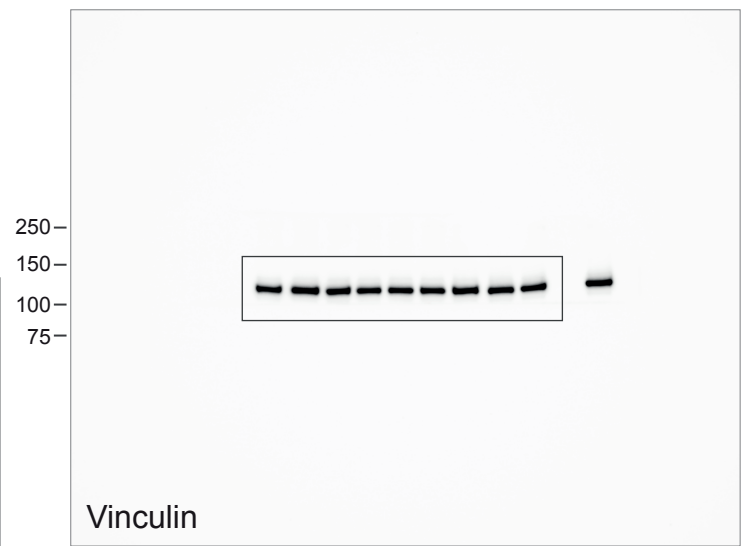

**Figure 2F**

WT      KO NIX      KO NIX  
+pBabe Ø +pBabe NIX  
DFP: - + - + - +

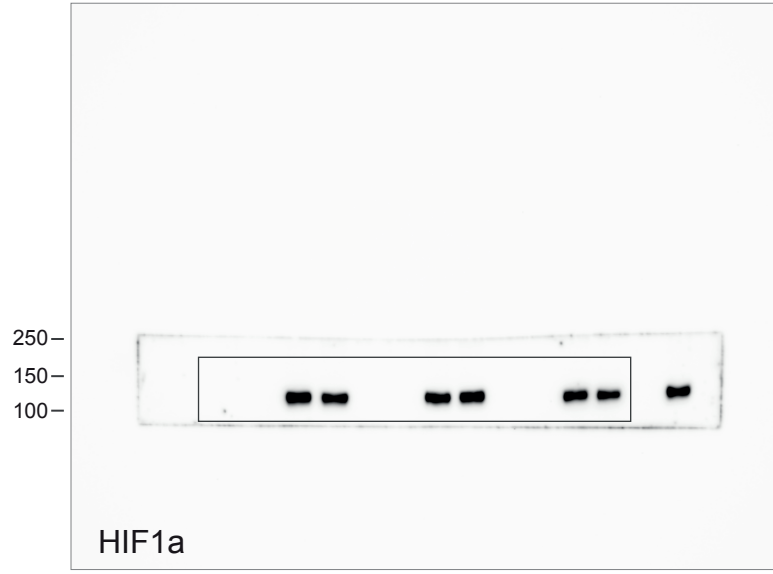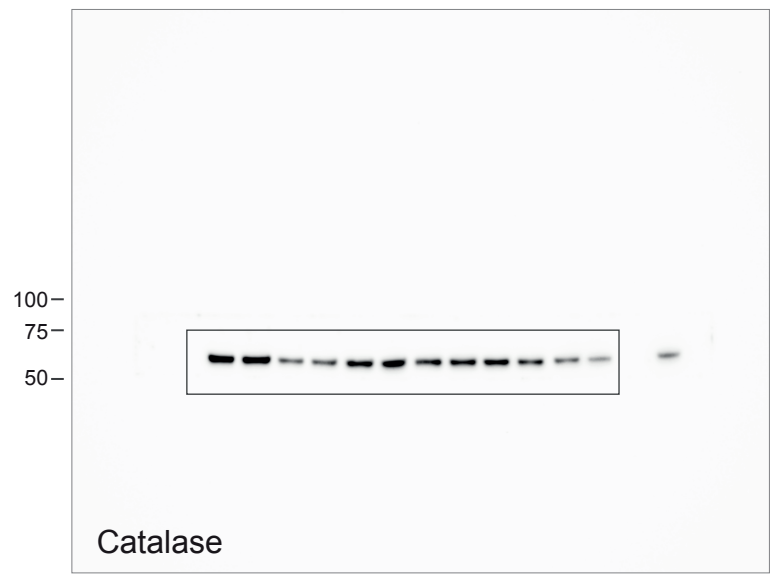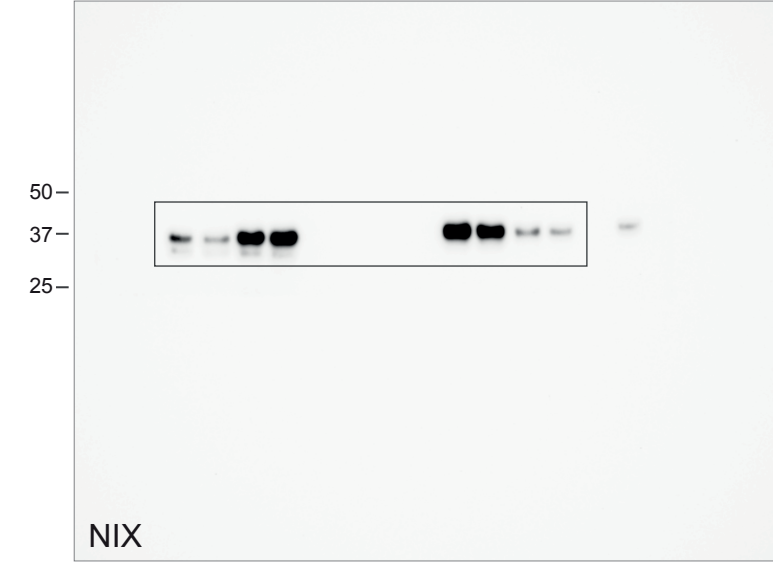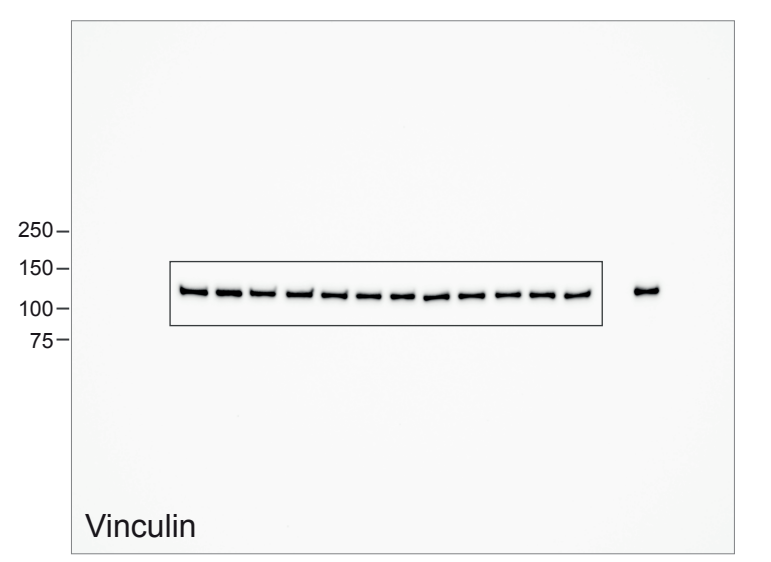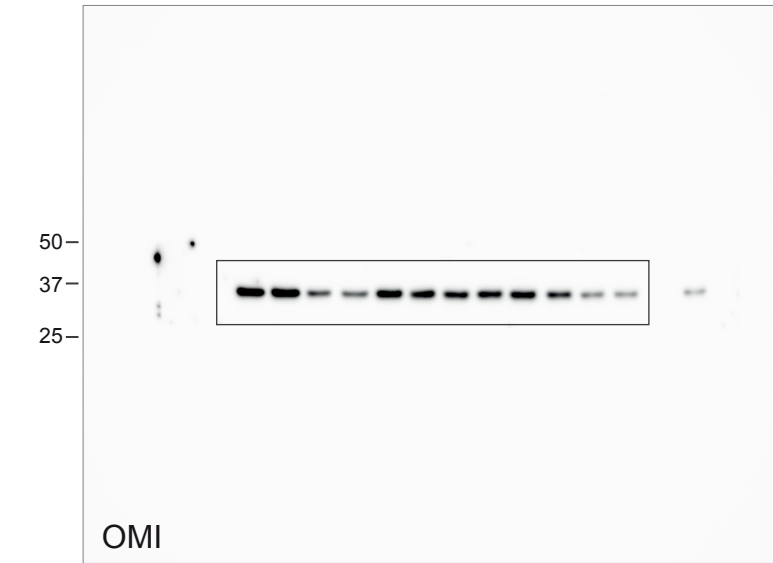

Supplement: EMBJ-41-e111115-s002.pdf [file EMBJ-41-e111115-s002.pdf]
