# Supplementary material for: BNIP3L/NIX regulates both mitophagy and pexophagy
Source: PubMed Central journal article supplement (PMC9753467; doi:10.15252/embj.2022111115), 2022-10-10
Supplement: EMBJ-41-e111115-s004.pdf [file EMBJ-41-e111115-s004.pdf]

# Figure 1A

Time of DFP (h)  
0 6 12 24 36 48 72

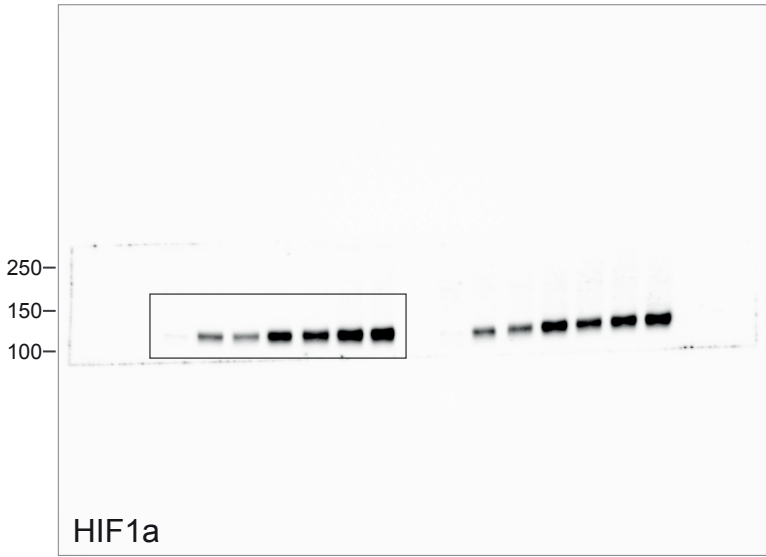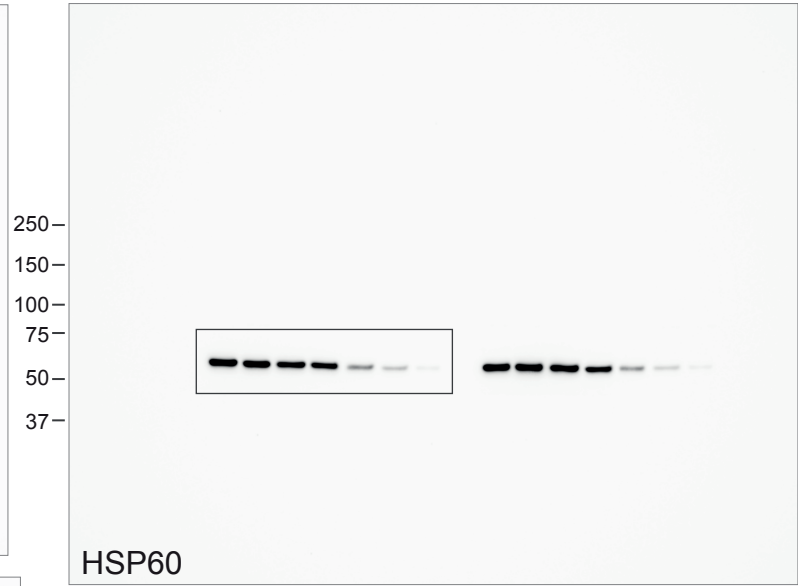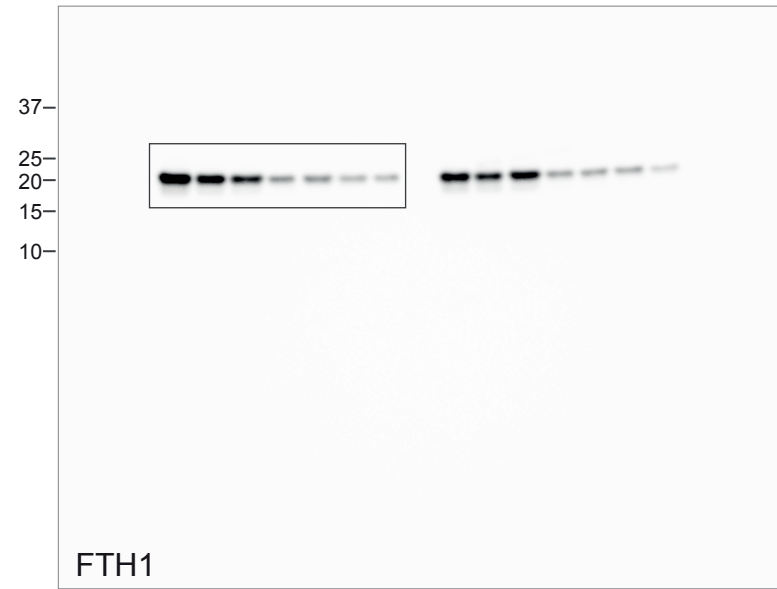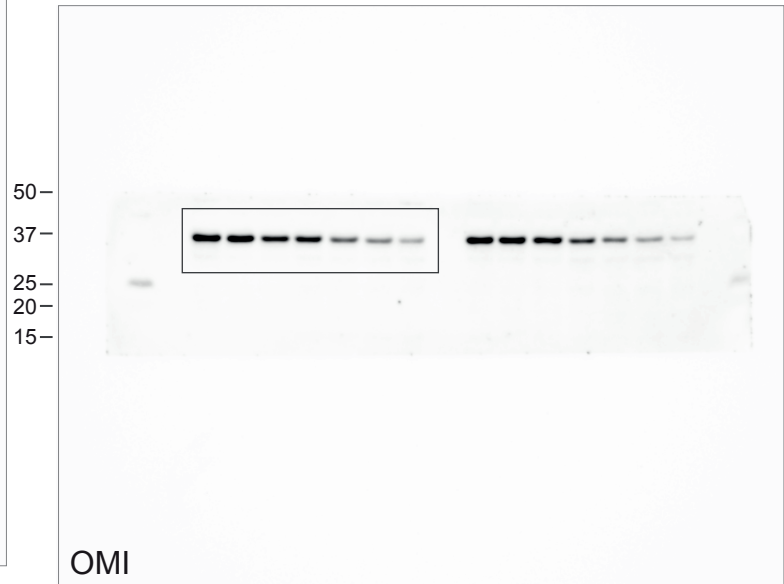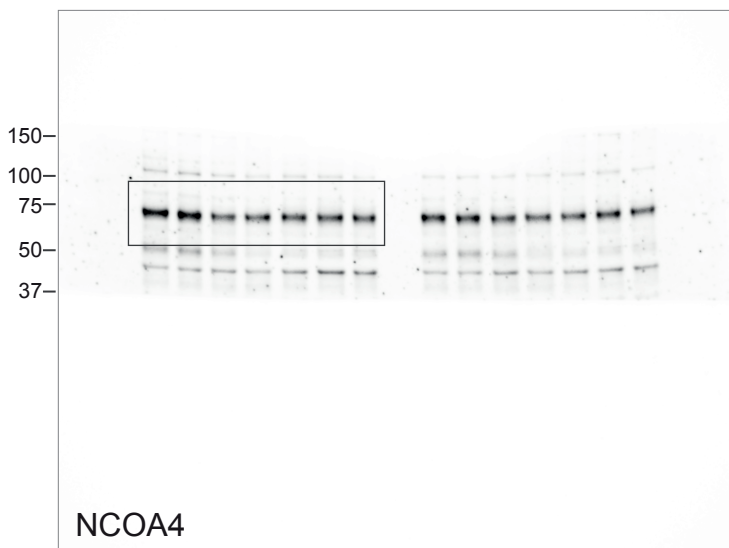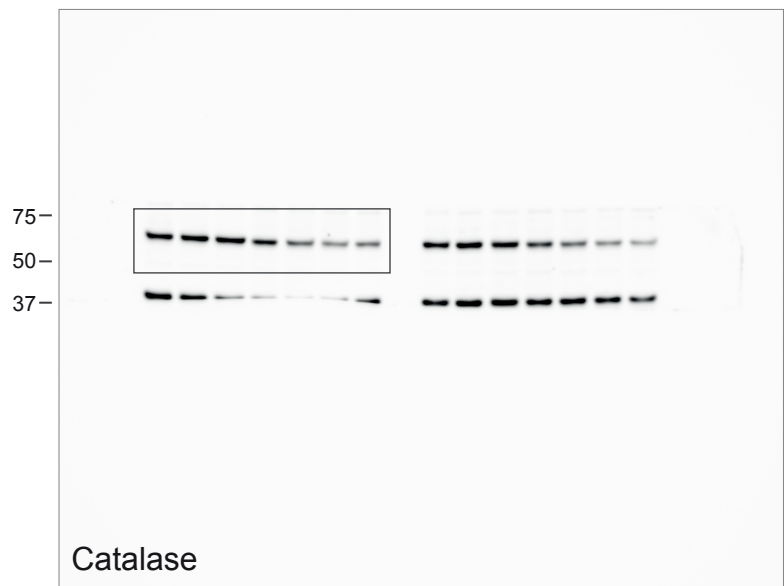

# Figure 1A

Time of DFP (h)  
0 6 12 24 36 48 72

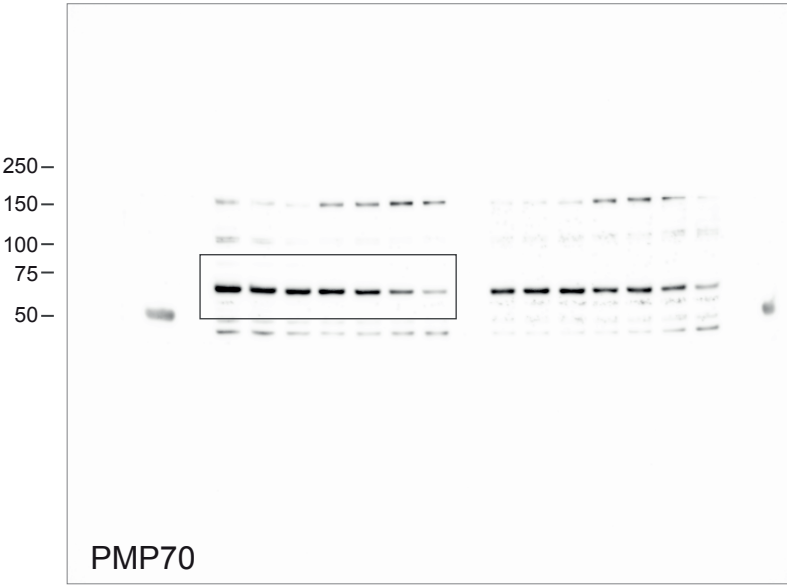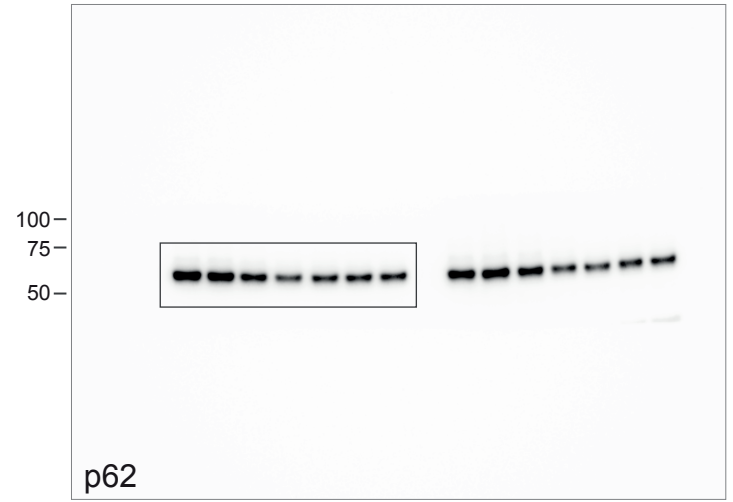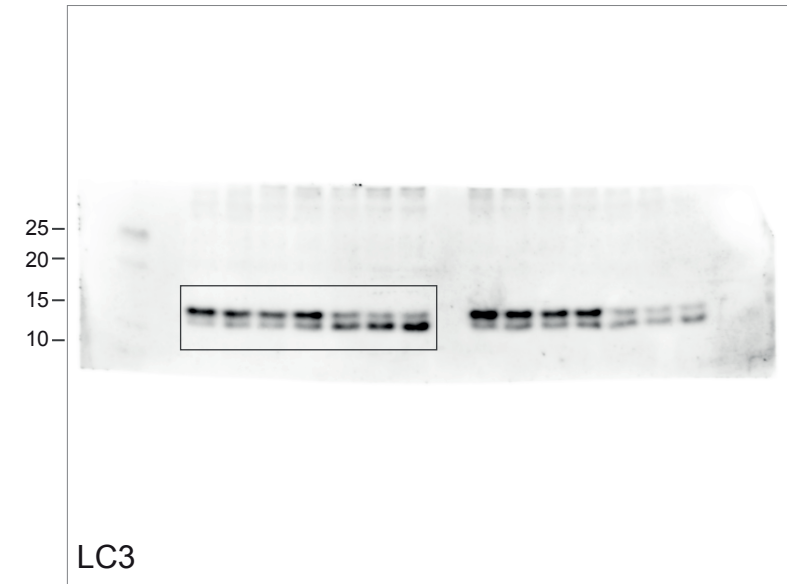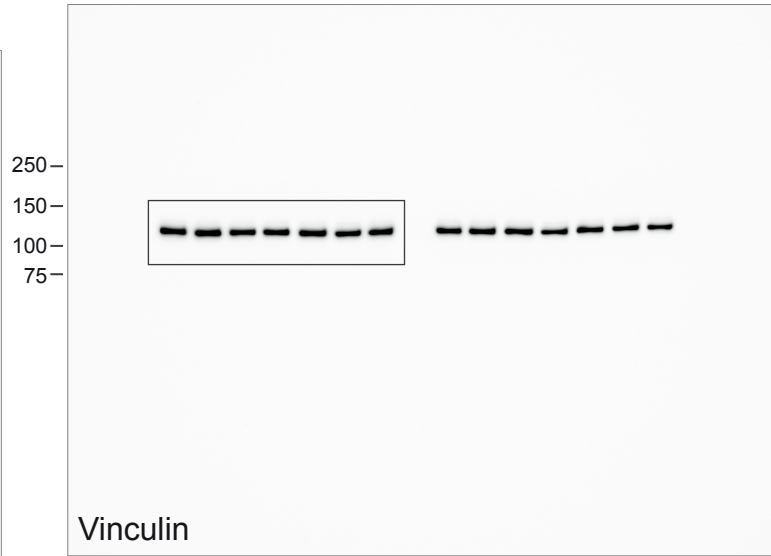

**Figure 1D**

siRNA: - - NT ATG13ULK1  
DFP: - + - + - + - +

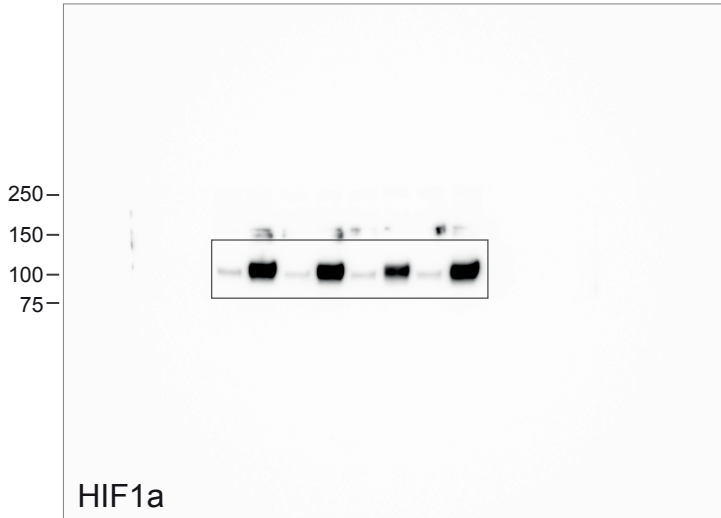

HIF1a

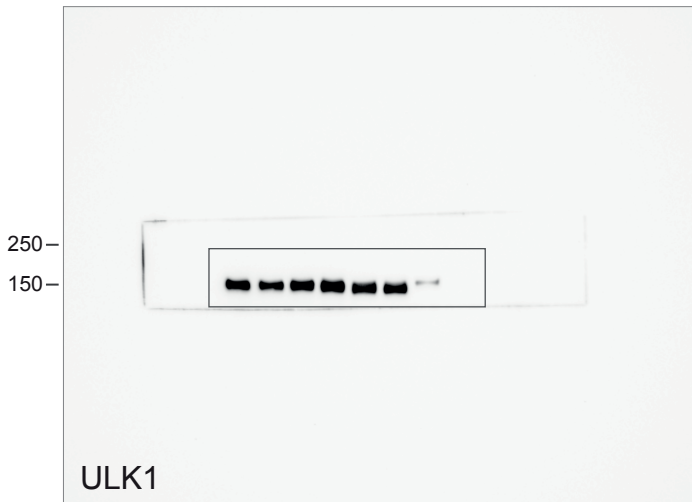

ULK1

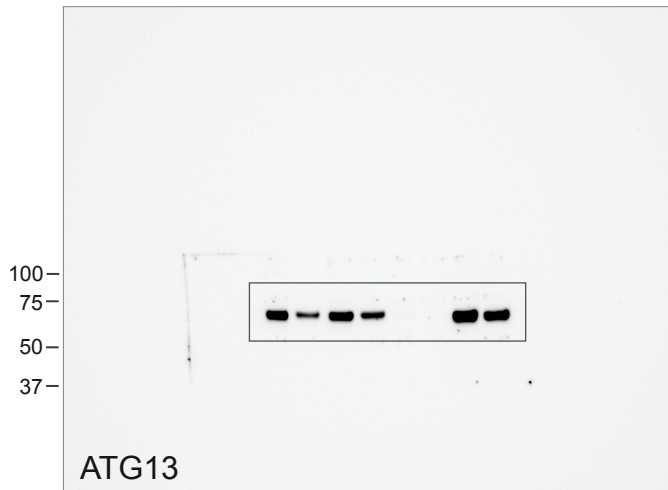

ATG13

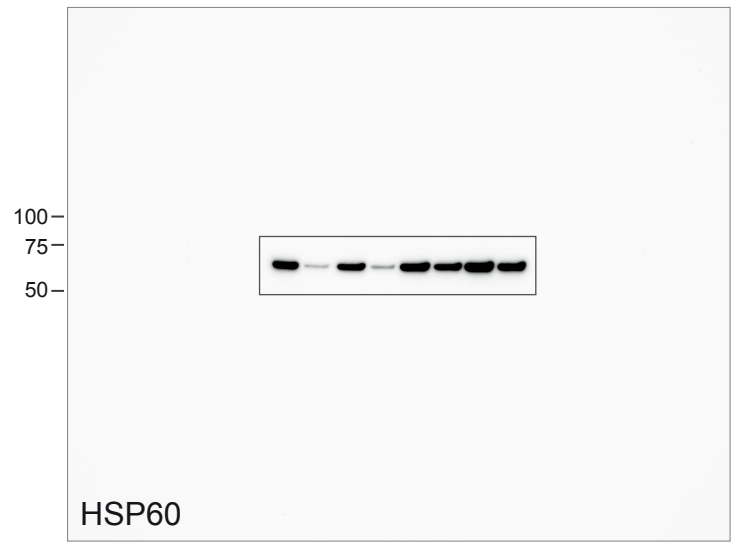

HSP60

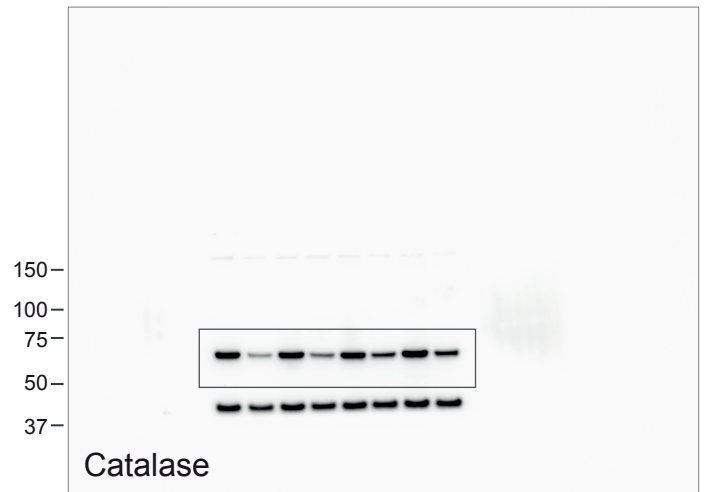

Catalase

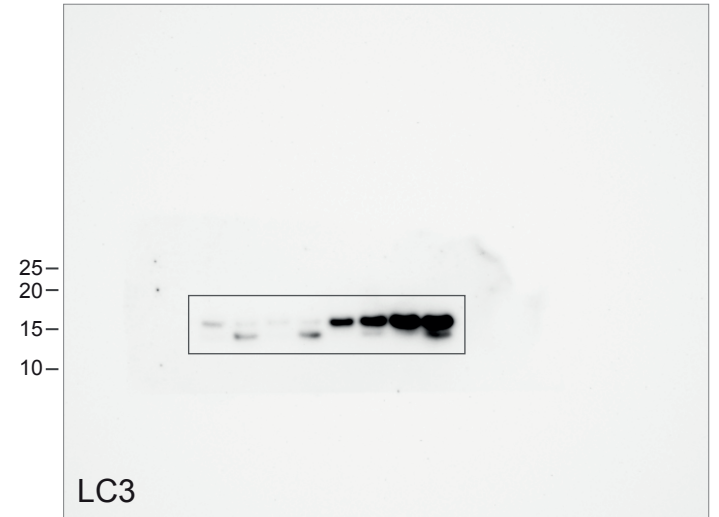

LC3

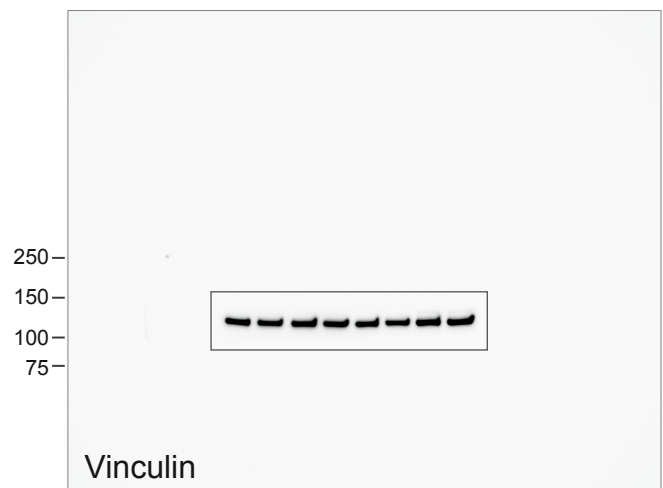

Vinculin
