# Supplementary material for: BNIP3L/NIX regulates both mitophagy and pexophagy
Source: PubMed Central journal article supplement (PMC9753467; doi:10.15252/embj.2022111115), 2022-10-10

**Figure 5B**

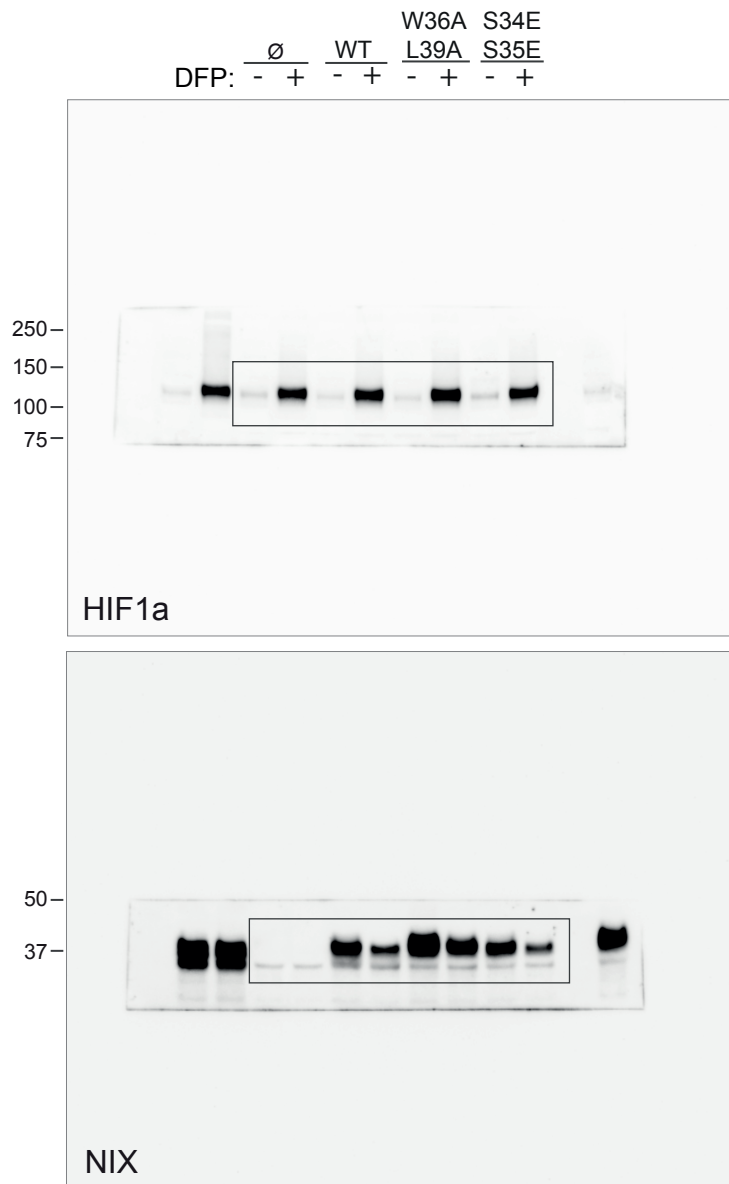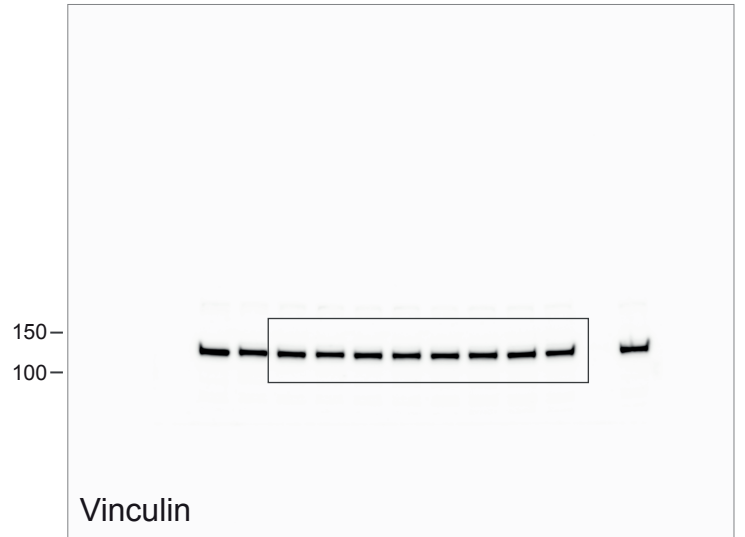

Supplement: EMBJ-41-e111115-s007.pdf [file EMBJ-41-e111115-s007.pdf]
