# Supplementary material for: BNIP3L/NIX regulates both mitophagy and pexophagy
Source: PubMed Central journal article supplement (PMC9753467; doi:10.15252/embj.2022111115), 2022-10-10

**Figure 4B**

CCCP  
WT PRKN WT PRKN  
DFP: - + - + - + - +

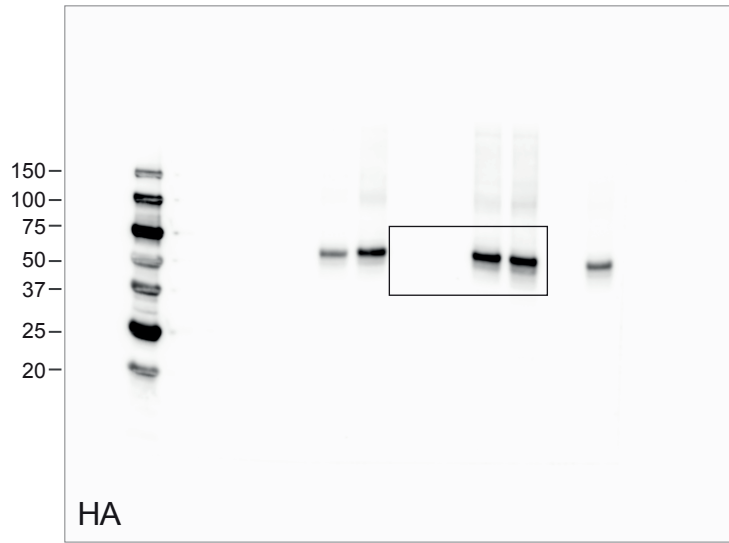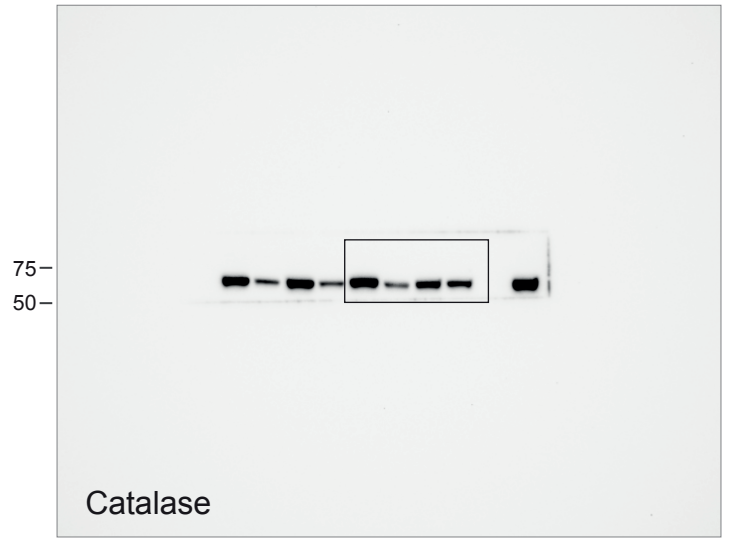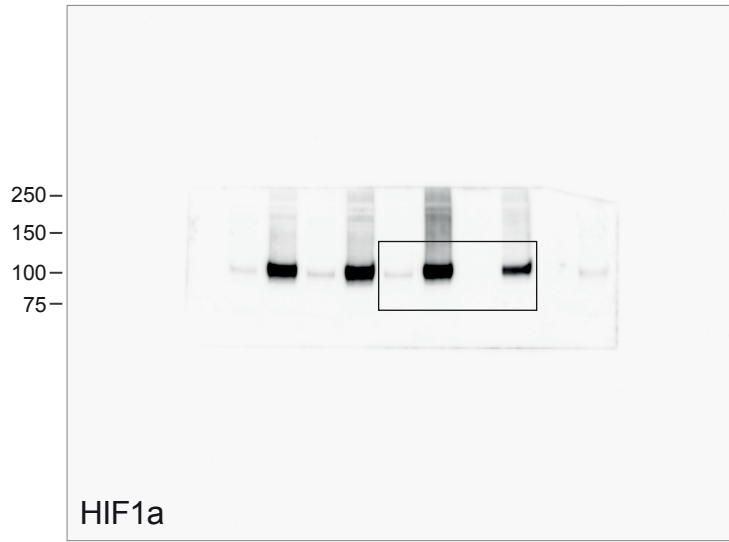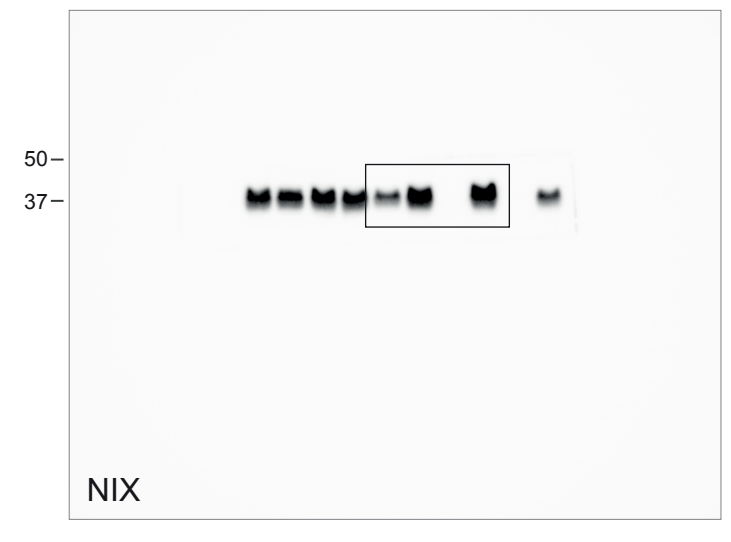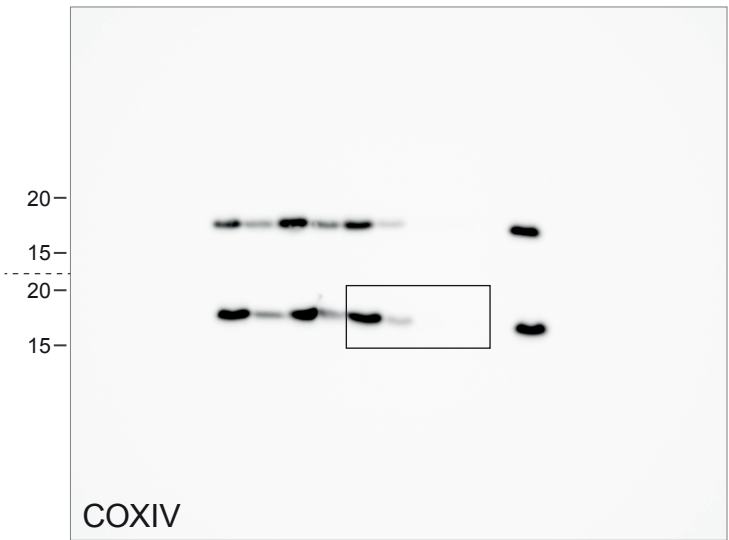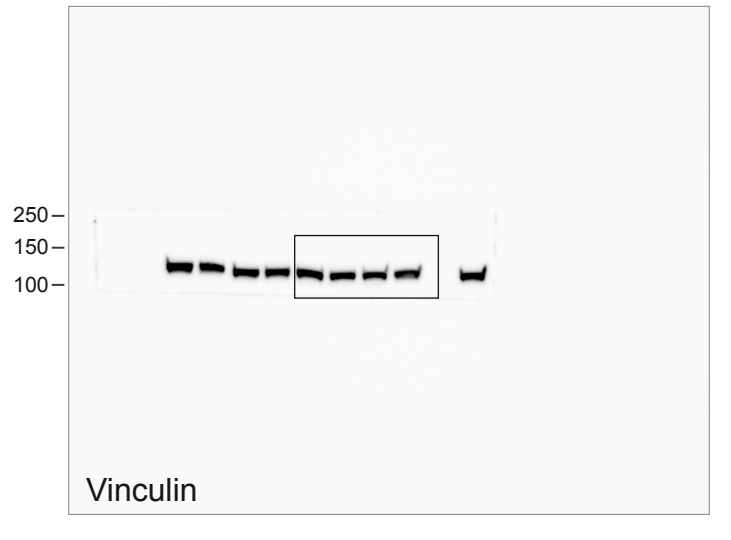

Supplement: EMBJ-41-e111115-s008.pdf [file EMBJ-41-e111115-s008.pdf]
